# Supplementary material for: Genetic potential for N₂O metabolism in tree tissues: Insights into nitrogen cycling gene abundance and nosZ diversity across trees
Source: Research Square preprint supplement (doi:10.21203/rs.3.rs-8339723/v1), 2025-12-24
Supplement: Supplementary file 1 [file b862f86b2c6ec72f3f0fe598.docx]

Krishnapriya Thiyagarasaiyar1, Dhiraj Paul1, Johanna Kerttula1, Milja Keski-Karhu1, Kaido Soosaar2, Ülo Mander2, Sara Hallin3, Katerina Machacova4, Jukka Pumpanen1, Henri M.P. Siljanen1

1 Department of Environmental and Biological Sciences, University of Eastern Finland, Kuopio, Finland

2 Department of Geography, Tartu University, Tartu, Estonia

3 Department of Forest Mycology and Plant Pathology, Swedish University of Agricultural Sciences, Uppsala, Sweden

4 Department of Ecosystem Trace Gas Exchange, Global Change Research Institute of the Czech Academy of Sciences, Brno, Czech Republic

*Correspondence:

Email: [krishnapriya.thiyagarasaiyar@uef.fi](mailto:krishnapriya.thiyagarasaiyar@uef.fi)


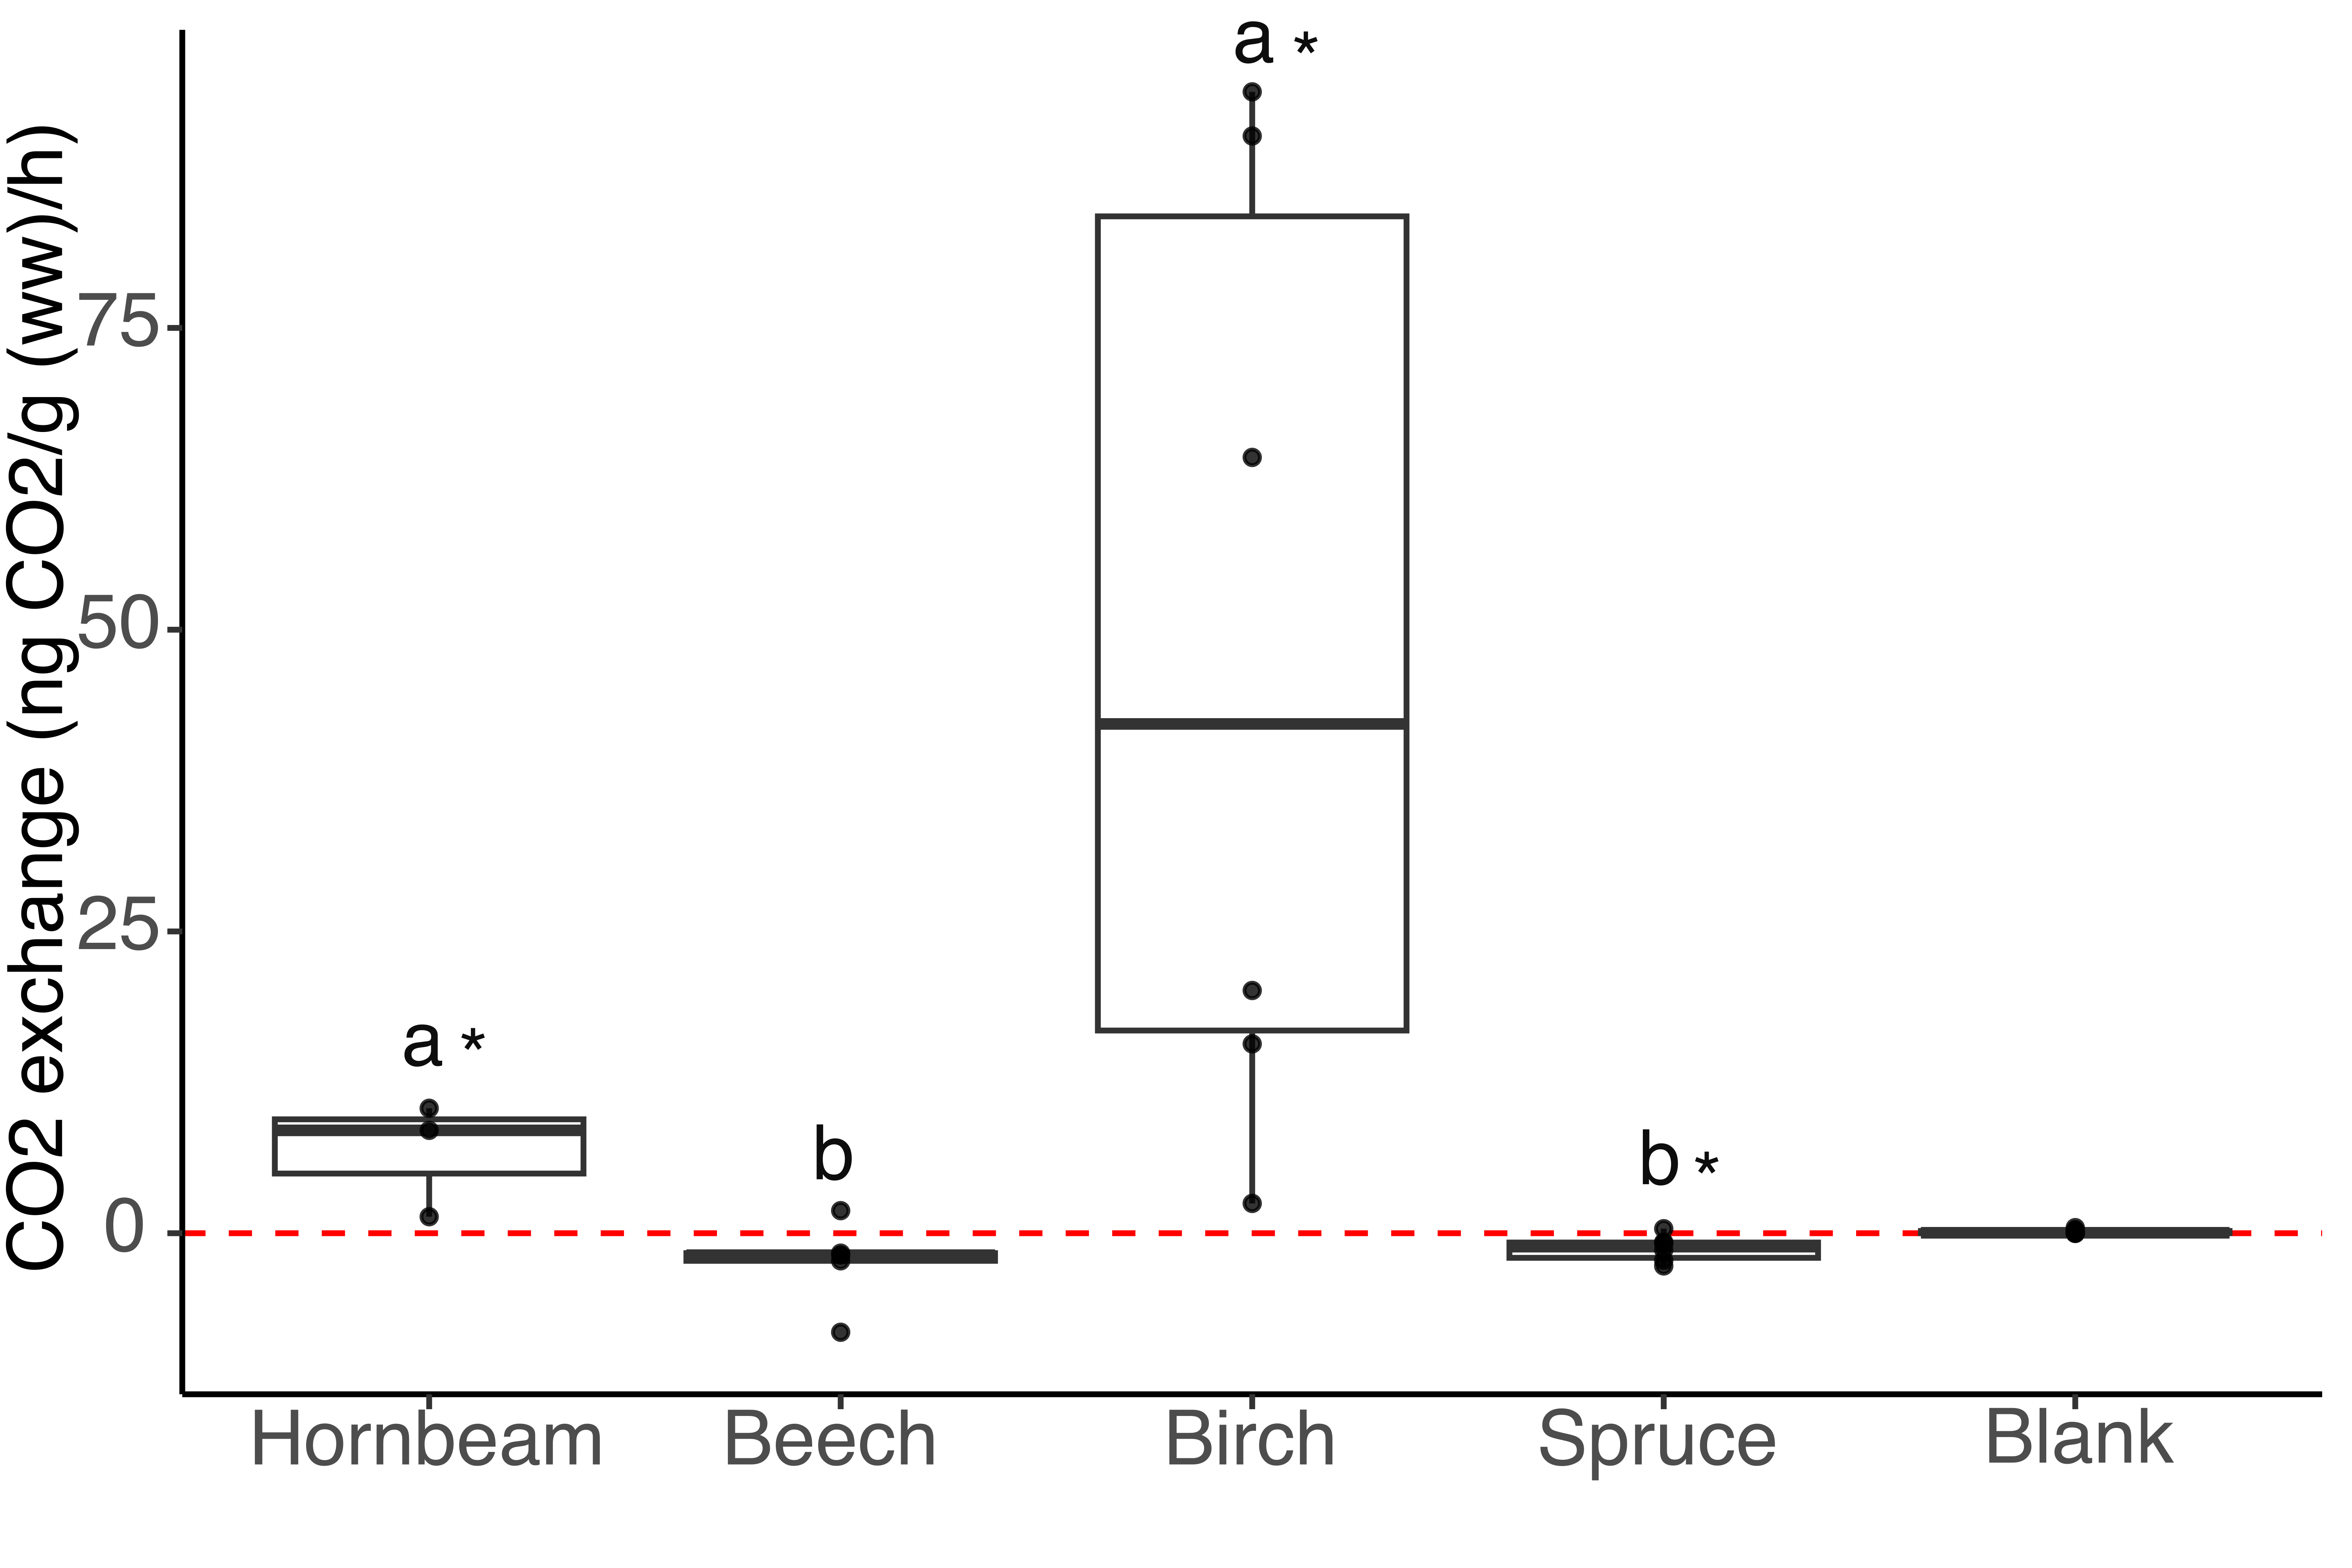


Fig.S1. CO2 exchange rate for shoot sample from incubation studies using gas chromatography. The box plots showed all the data points in black dots, and black line inside the box represents the median (n ≥ 3). Significant differences are indicated by different letters and were determined separately for CO2 exchanges across trees * indicate statistical difference (*P* < 0.05) between trees and blank.


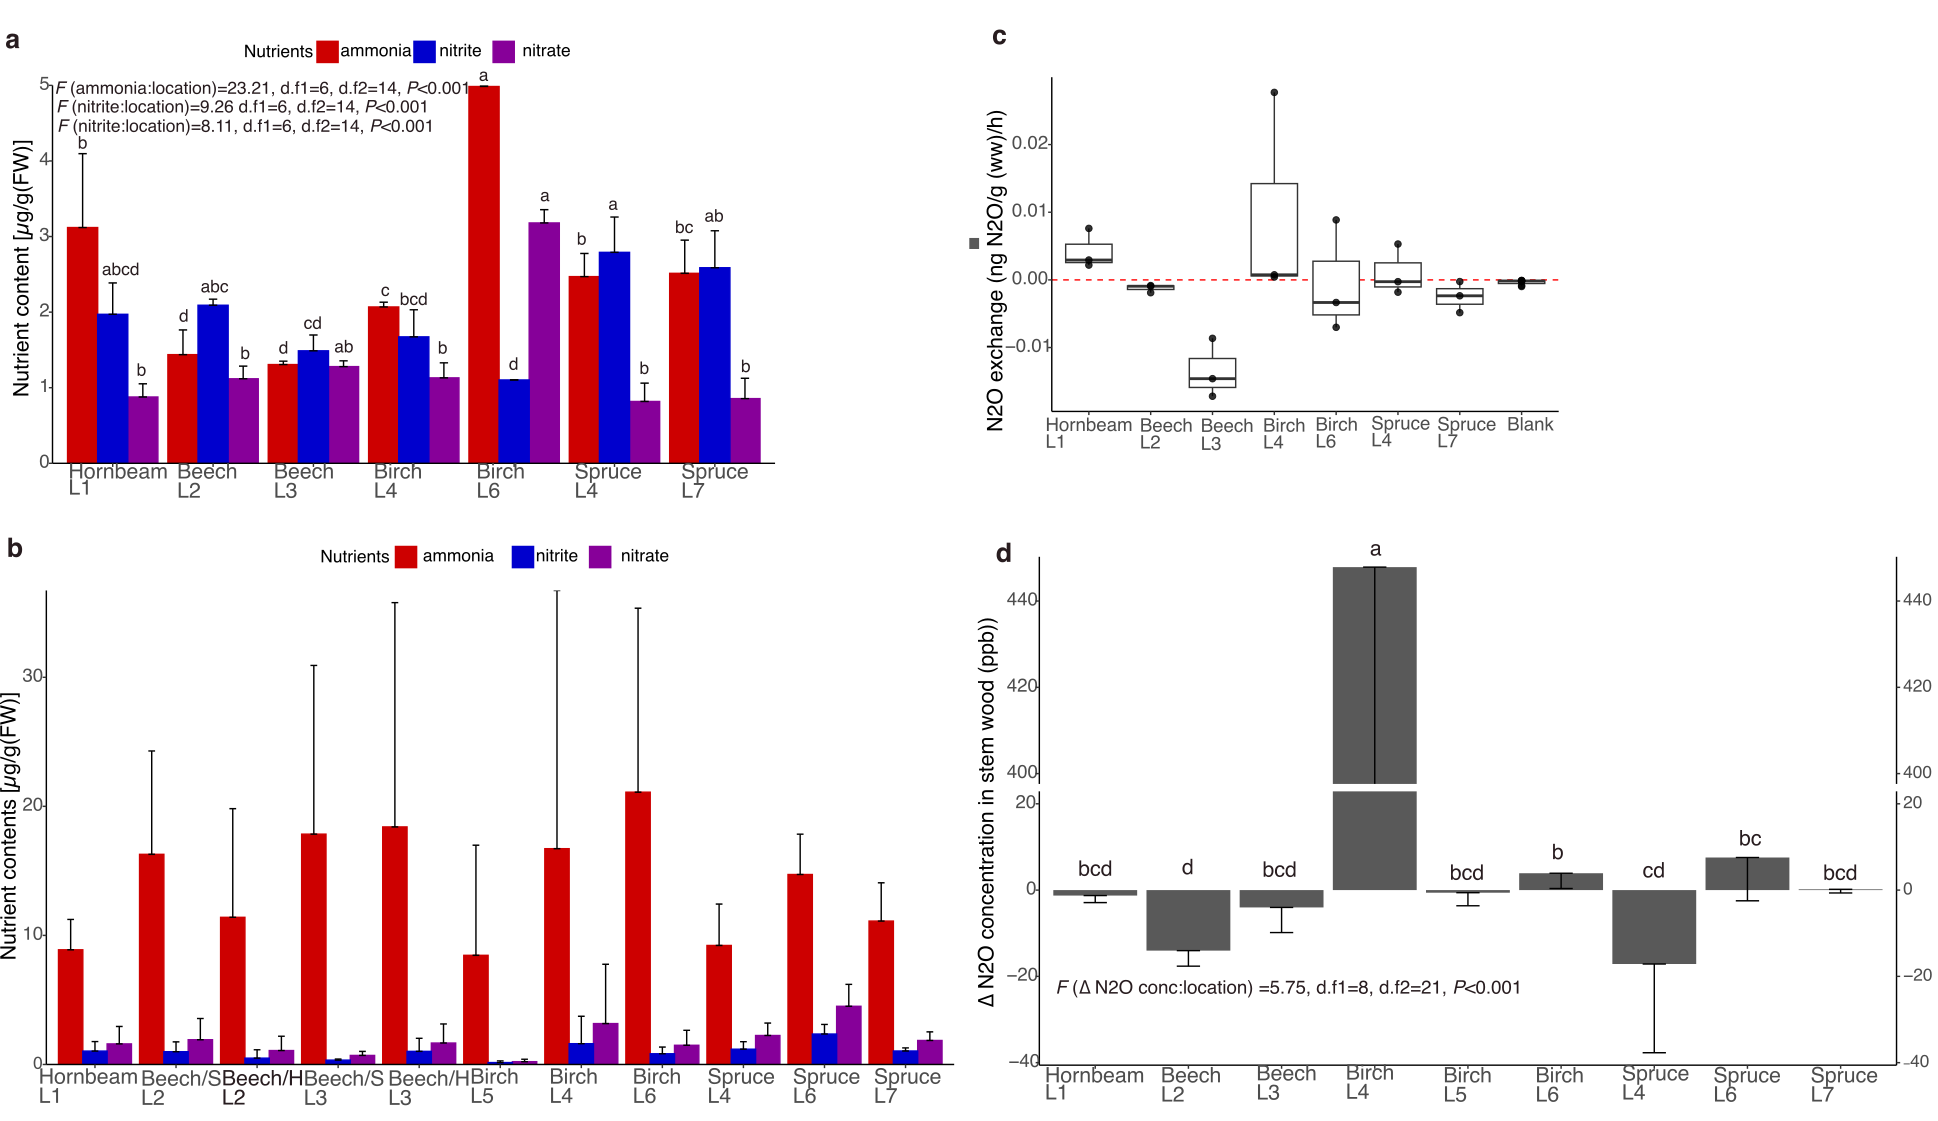


Figure S2: Nutrient content and N2O fluxes in plant tissues collected from different locations. (a): NH4+, NO2– and NO3– concentrations in shoots (mean+standard deviation), (b): NH4+, NO2– and NO3– in wood cores (mean+standard deviation), (c): N2O exchange of shoots (mean+standard deviation), (d): D N2O concentration in stem wood (Cstem wood – Cambient air; mean–standard deviation). Significant differences are indicated by different letters and were determined separately for each nutrients across locations (*P* < 0.05) in (a) and statistical difference between different locations in (d). No significant differences were observed in (b) and (c). Beech/S means beech sapwood and Beech/H means beech heartwood in b. L1= Lanžhot, Czech Republic; L2= Štítná nad Vláří, Czech Republic; L3= Bromarv, Finland; L4=Agali, Estonia; L5= Kiidjärve, Estonia; L6=Puijo, Finland; L7=Kenttärova-Pallas, Finland.


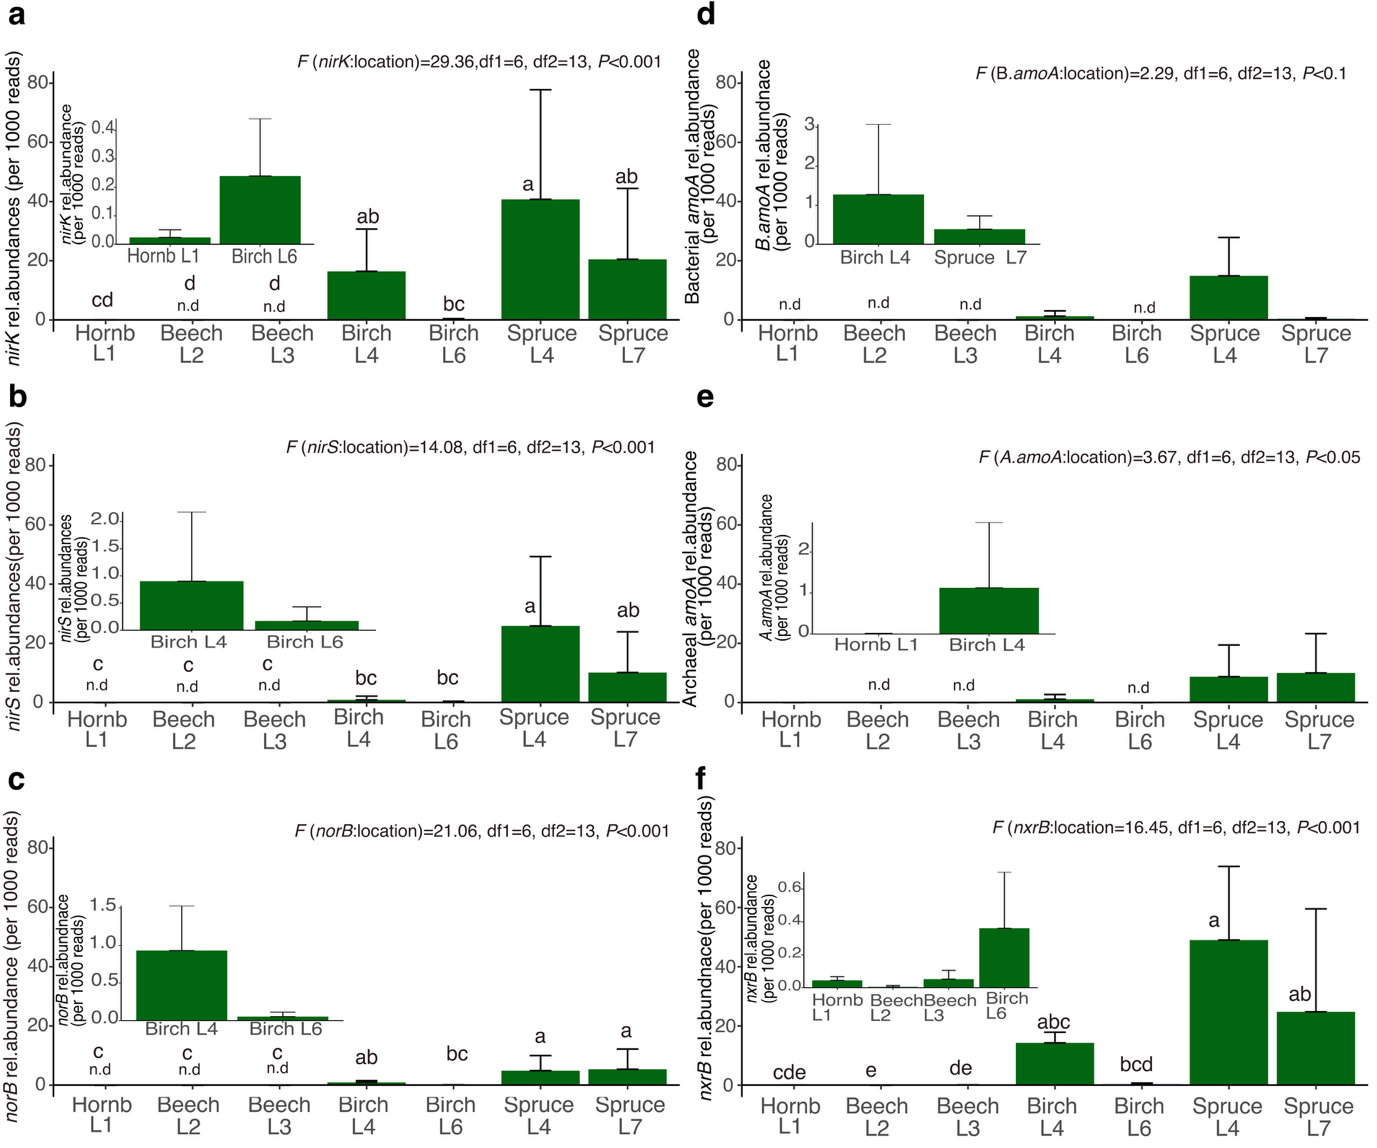


Figure S3: Relative abundances of denitrification and nitrification genes in shoot tissues from different locations. Relative abundances were calculated as total counts in relation to total reads (mean+standard deviation). (a) *nirK*, (b) *nirS*, (c) *norB*, (d) bacterial *amoA*, (e) archaeal *amoA*, (f) *nxrB*. Sites where N cycling genes were not detected are marked with n.d. L1= Lanžhot, Czech Republic; L2= Štítná nad Vláří, Czech Republic; L3= Bromarv, Finland; L4=Agali, Estonia; L6=Puijo, Finland; L7=Kenttärova-Pallas, Finland.


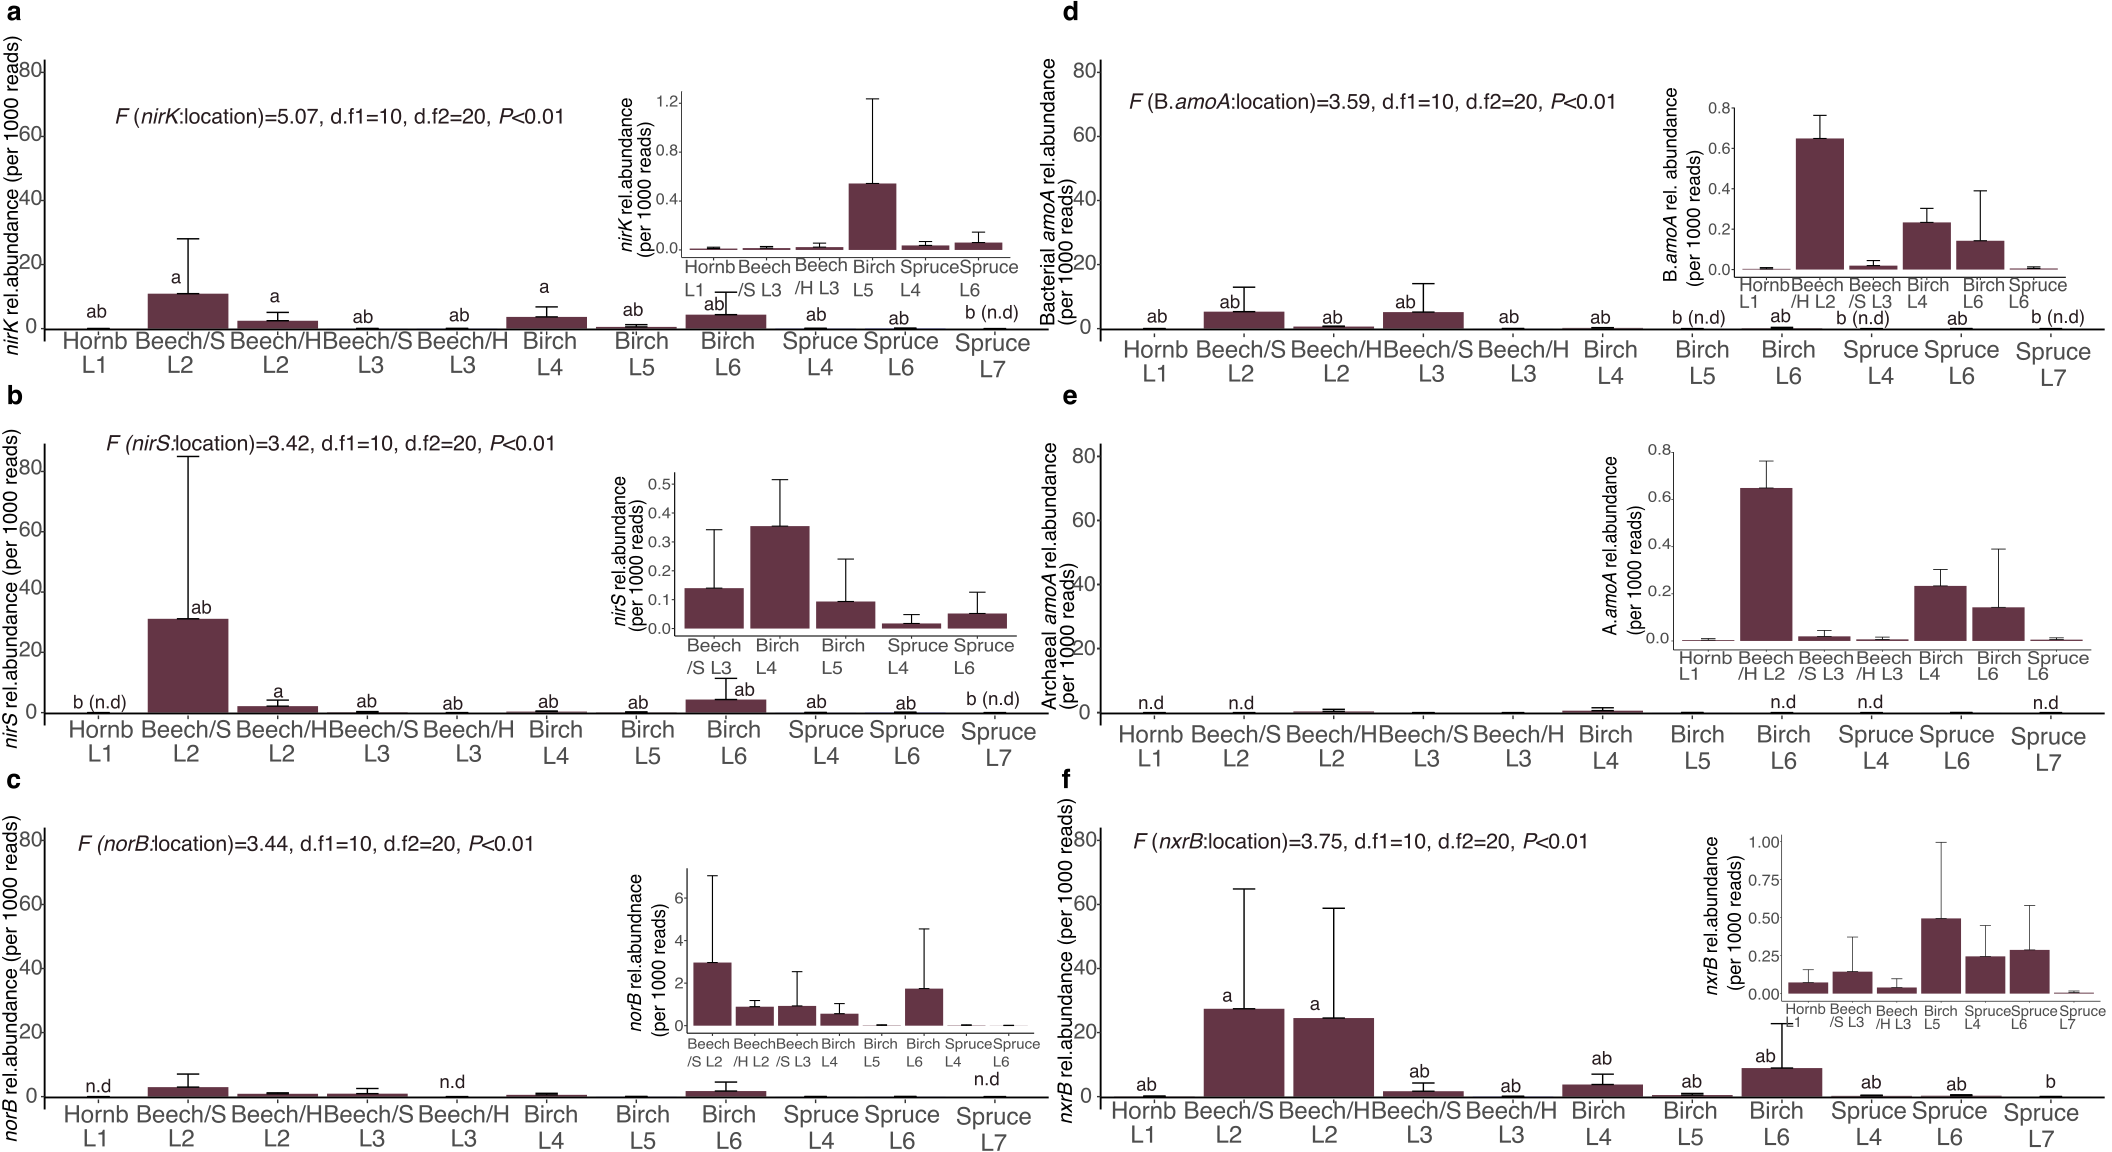


Figure S4: Relative abundances of denitrification and nitrification genes in wood cores from different locations. Relative abundances were calculated as total counts in relation to total reads (mean+standard deviation). (a) *nirK*, (b) *nirS*, (c) *norB*, (d) bacterial *amoA*, (e) archaeal *amoA*, (f) *nxrB*. Sites where N cycling genes were not detected are marked with n.d. Beech/S means beech sapwood and Beech/H means beech heartwood. L1= Lanžhot, Czech Republic; L2= Štítná nad Vláří, Czech Republic; L3= Bromarv, Finland; L4=Agali, Estonia; L5= Kiidjärve, Estonia; L6=Puijo, Finland; L7=Kenttärova-Pallas, Finland.


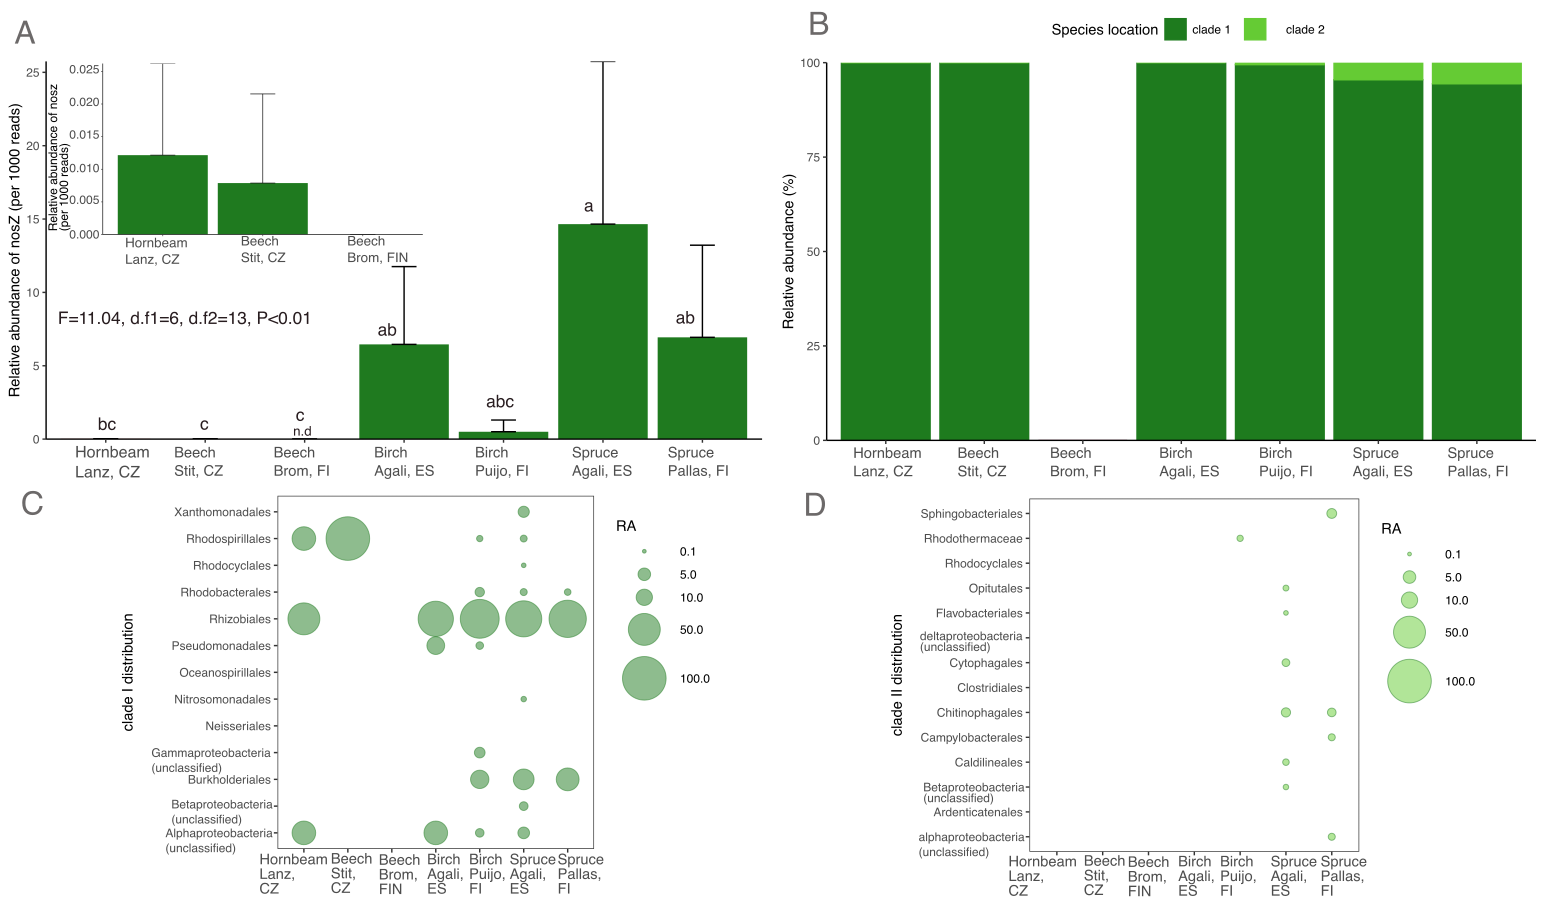


Figure S5: The *nosZ* genes in shoots. (a): Relative abundance of *nosZ* genes calculated as total counts in relation to total reads (mean+standard deviation). (b): Clade-specific relative abundance of *nosZ* normalized to total *nosZ* reads. (c) and (d): *nosZ* clade I and II distribution based on the classification at the order level. Sites where N cycling genes were not detected are marked with n.d. L1 = Lanžhot, Czech Republic; L2 = Štítná nad Vláří, Czech Republic; L3 = Bromarv, Finland; L4=Agali, Estonia; L6=Puijo, Finland; L7=Kenttärova-Pallas, Finland.


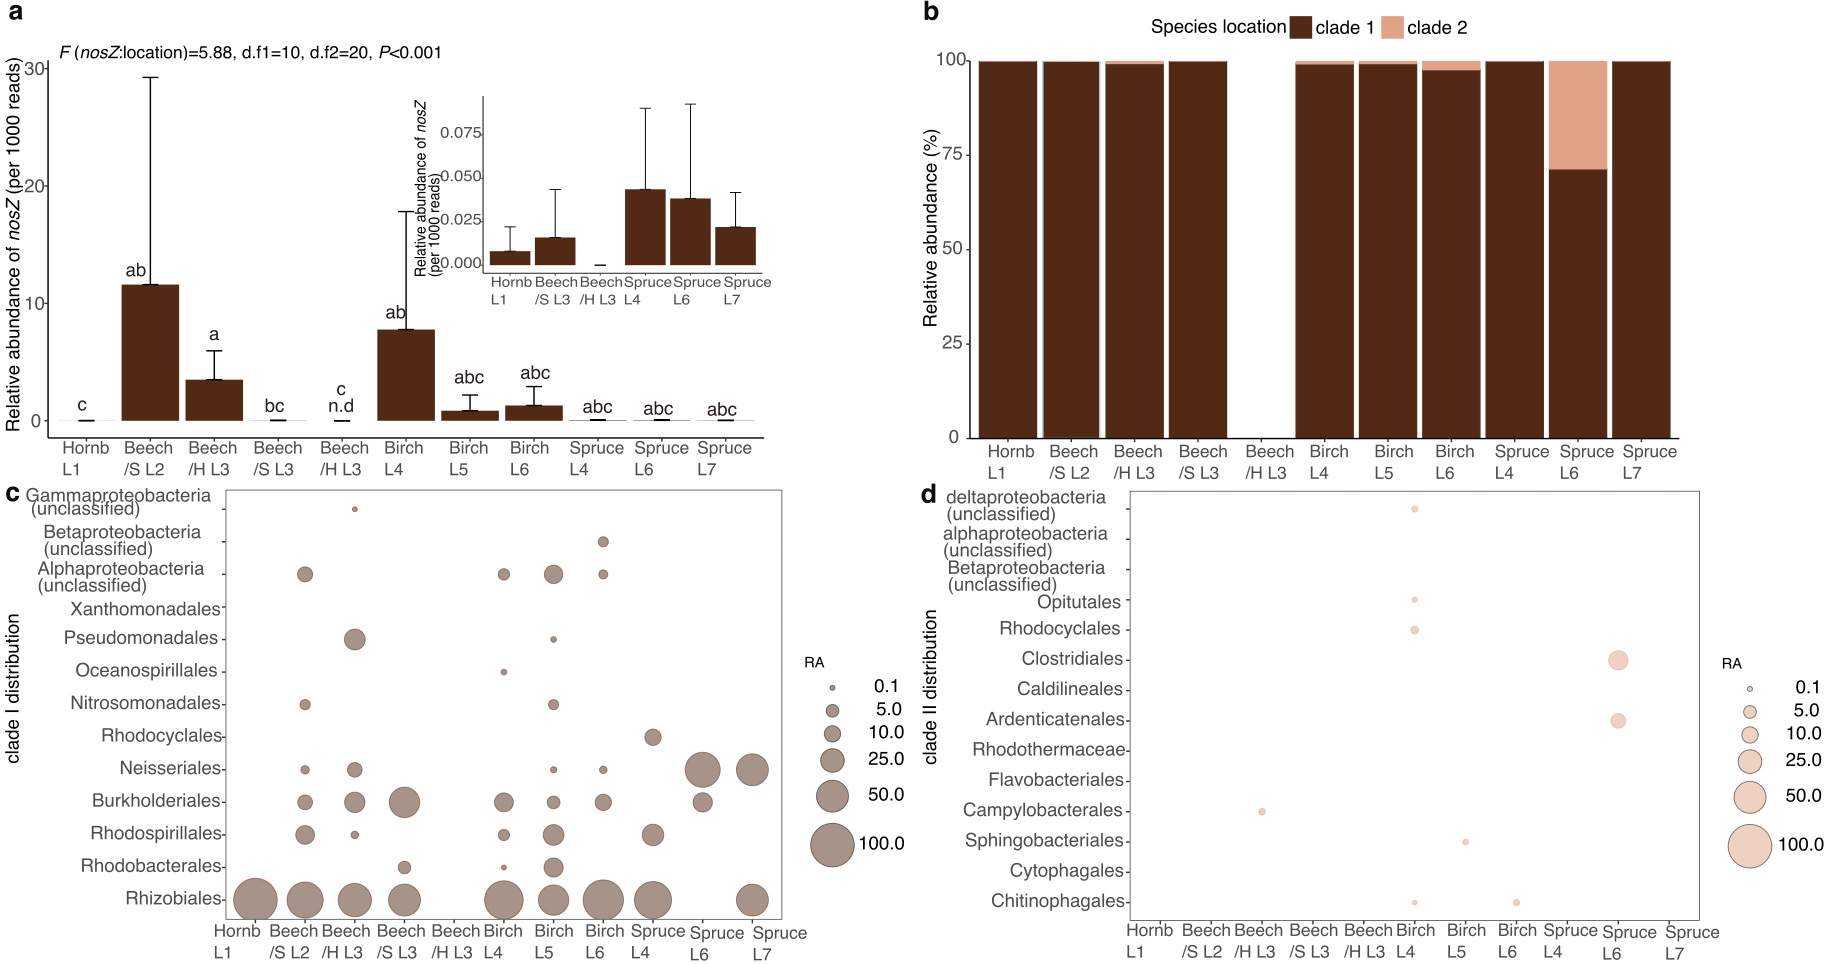


Figure S6: *nosZ* genes in wood core samples. (a): Relative abundance of *nosZ* calculated as total counts in relation to total reads (mean+standard deviation). (b): Clade-specific relative abundance of *nosZ* normalized to total *nosZ* reads. (c) and (d): *nosZ* clade I and II distribution based on the classification at the order level. Beech/S means beech sapwood and Beech/H means beech heartwood. Sites where N cycling genes were not detected are marked with n.d. L1= Lanžhot, Czech Republic; L2= Štítná nad Vláří, Czech Republic; L3= Bromarv, Finland; L4=Agali, Estonia; L5= Kiidjärve, Estonia; L6=Puijo, Finland; L7=Kenttärova-Pallas, Finland.
